# Supplementary material for: Celecoxib suppresses autophagy and enhances cytotoxicity of imatinib in imatinib-resistant chronic myeloid leukemia cells
Source: Springer Nature journal article supplement (doi:10.1186/s12967-016-1012-8), 2016-09-20

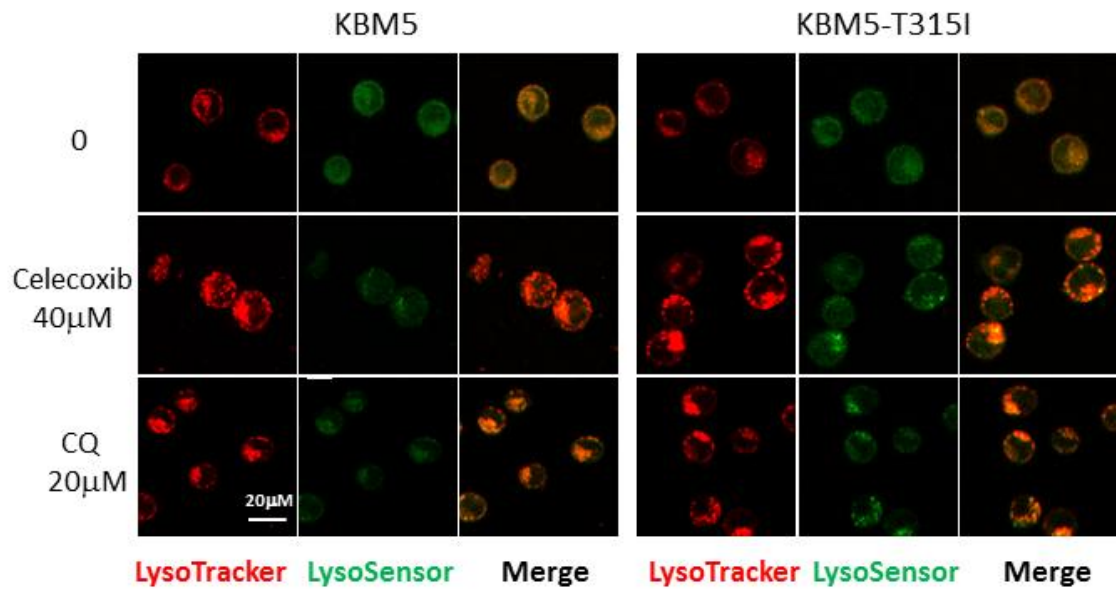

Supplement: MOESM1 [file 10720948]
